# Supplementary material
Source: PubMed Central journal article supplement (PMC1829275)

**A**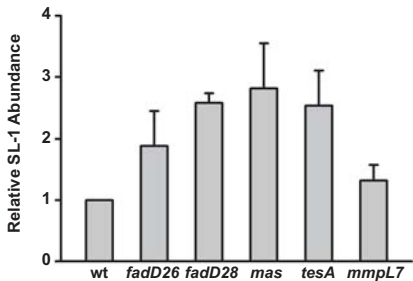**B**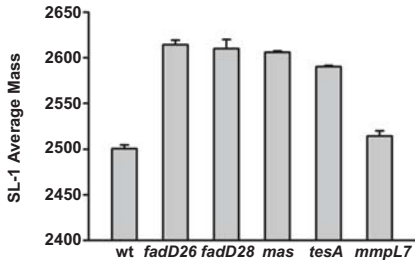

Supplement: pnas_0610634104_1.pdf [file pnas_0610634104_1.pdf]

**A**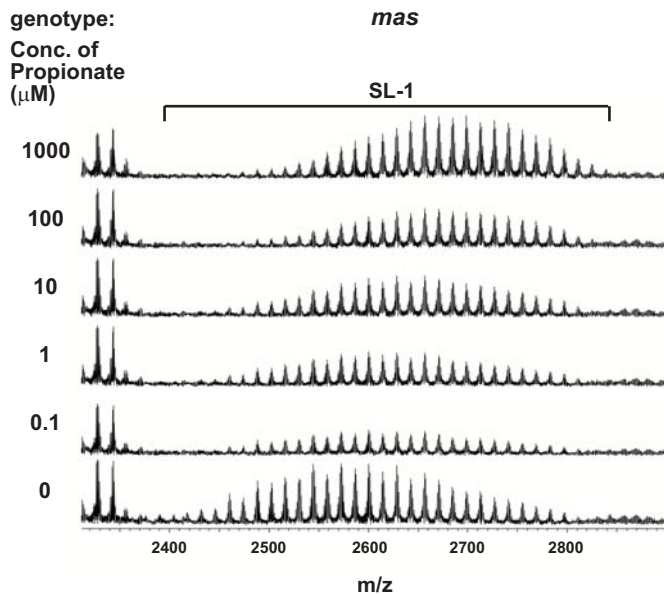**B**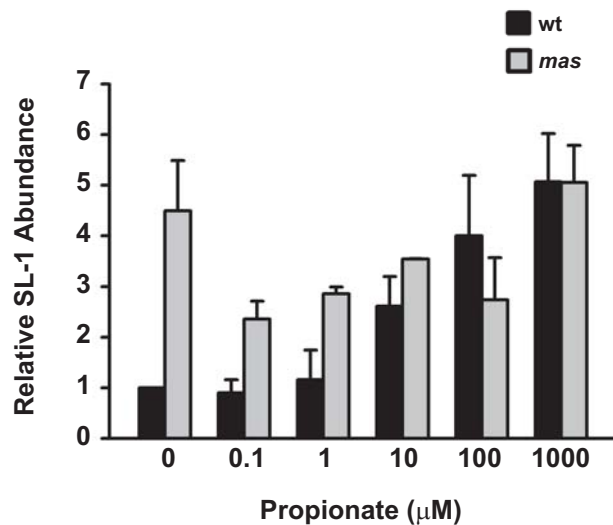**C**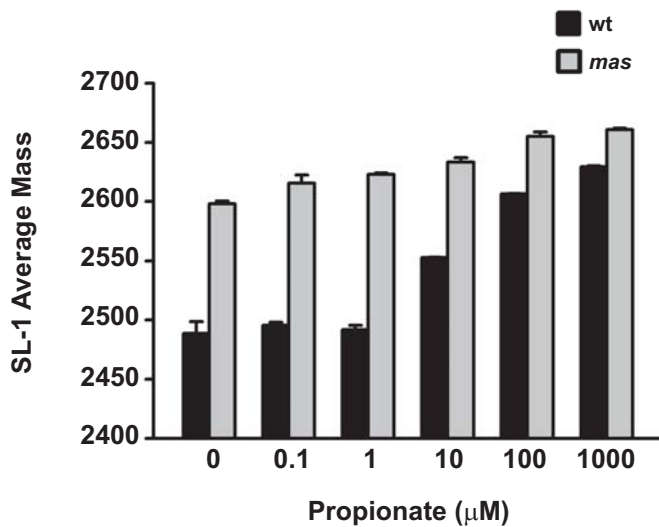

Supplement: pnas_0610634104_2.pdf [file pnas_0610634104_2.pdf]

**A**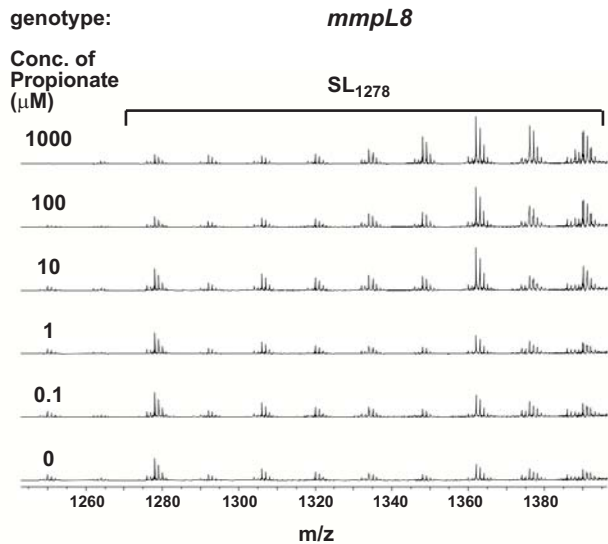**B**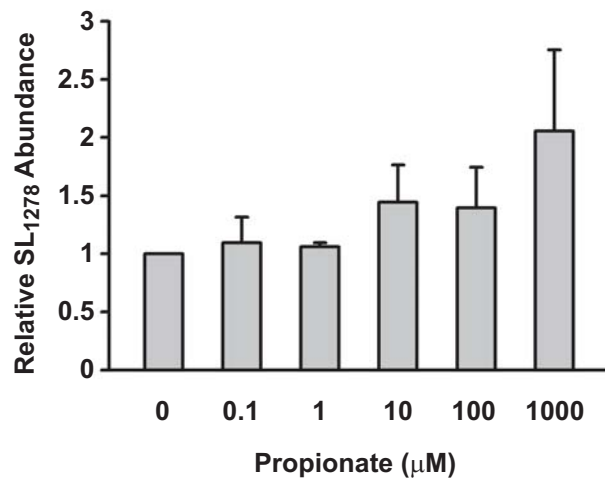**C**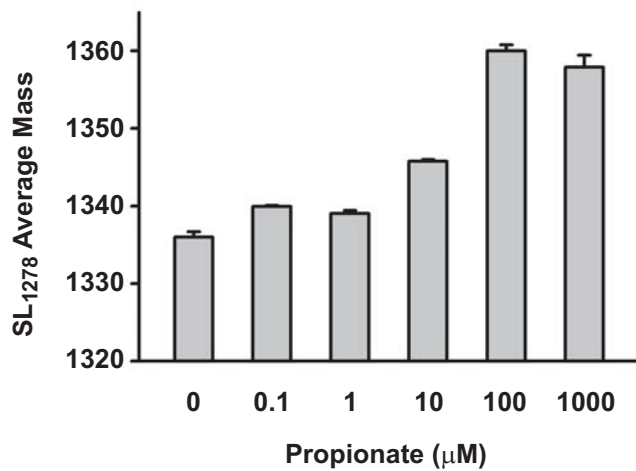

Supplement: pnas_0610634104_3.pdf [file pnas_0610634104_3.pdf]

**A**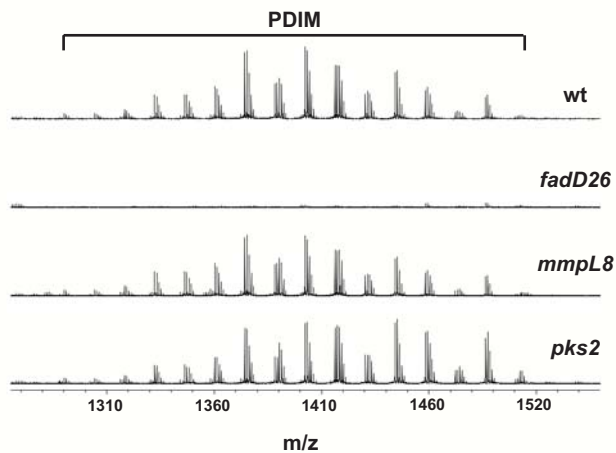**B**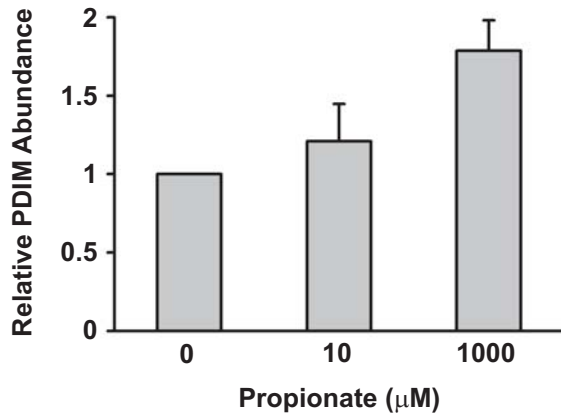**C**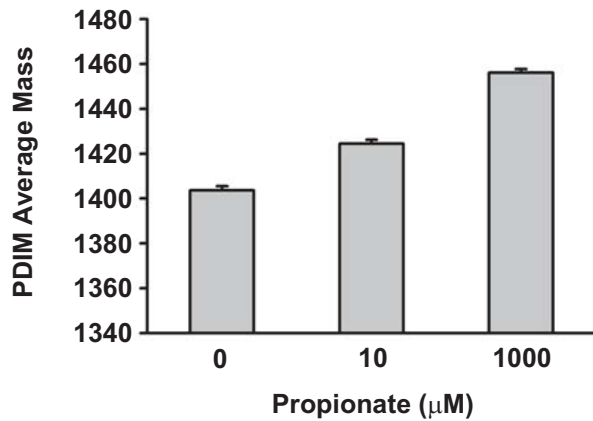

Supplement: pnas_0610634104_4.pdf [file pnas_0610634104_4.pdf]

**A**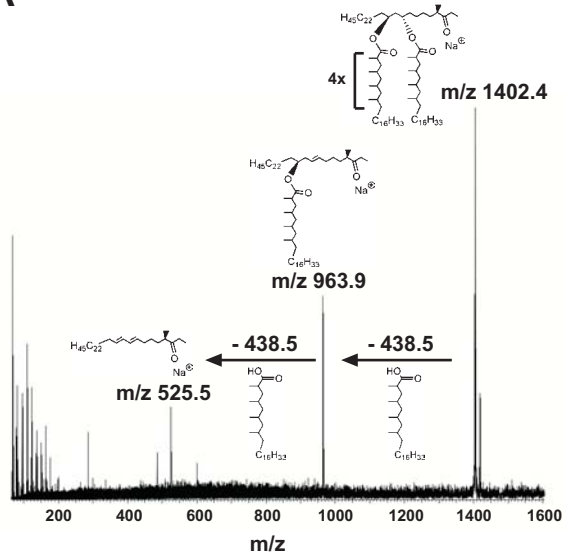**B**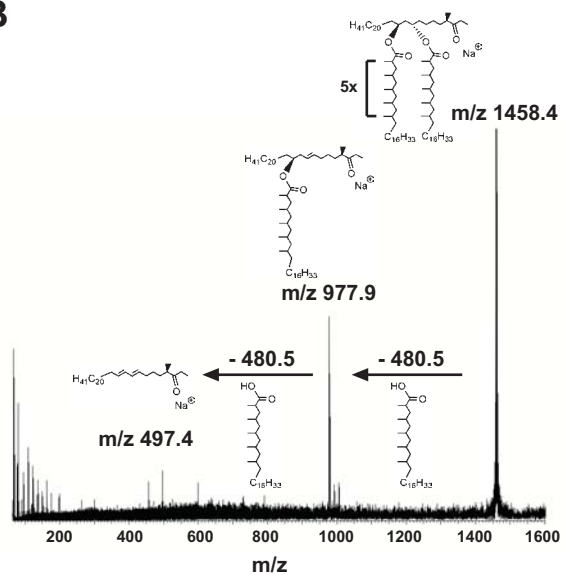**C**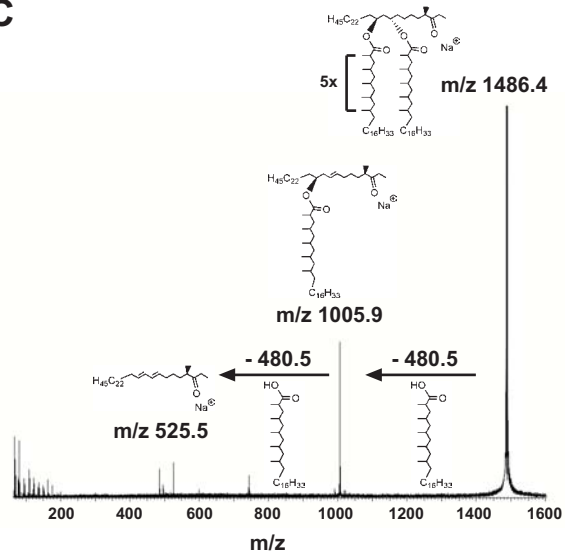

Supplement: pnas_0610634104_5.pdf [file pnas_0610634104_5.pdf]

**A**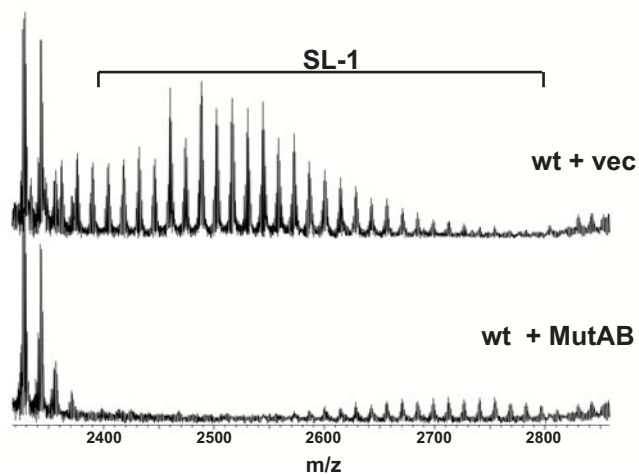**B**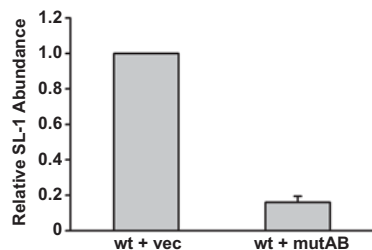**C**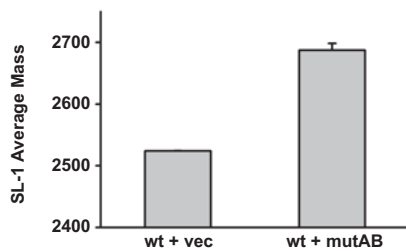**D**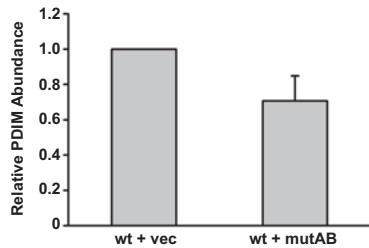**E**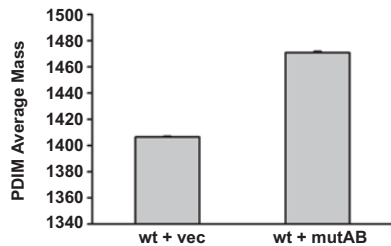

Supplement: pnas_0610634104_6.pdf [file pnas_0610634104_6.pdf]

**A**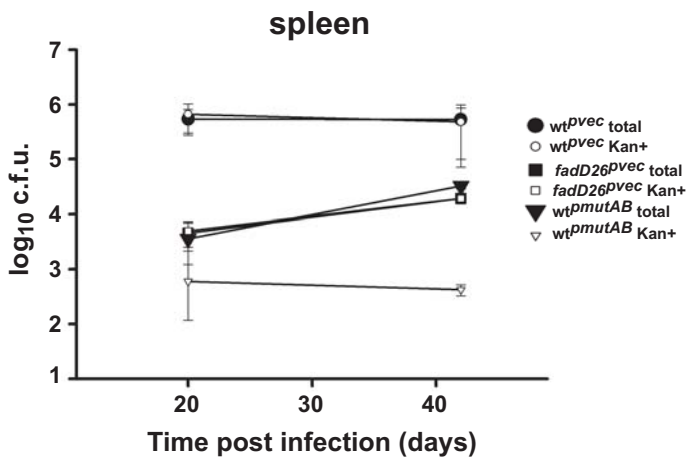**B**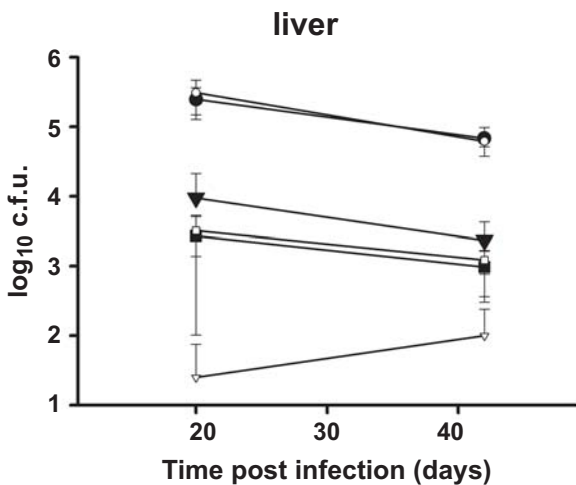

Supplement: pnas_0610634104_7.pdf [file pnas_0610634104_7.pdf]

genotype:

wt

SL-1

valerate

butyrate

propionate

acetate

glucose

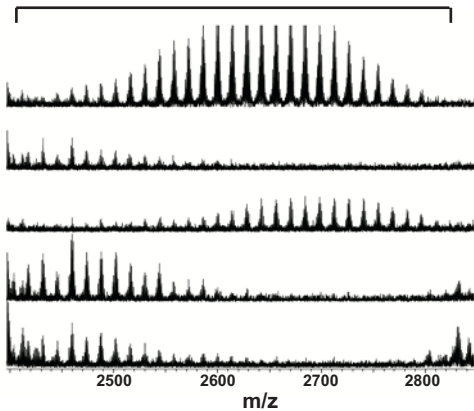

Supplement: pnas_0610634104_8.pdf [file pnas_0610634104_8.pdf]
